# Supplementary material for: COVID-19 severity and complications associated with low diversity, dysbiosis and predictive metagenome features of the oropharyngeal microbiome.
Source: Research Square preprint supplement (doi:10.21203/rs.3.rs-127621/v1), 2021-01-06
Supplement: Supplementary file 2 [file aabf2b034a9294af2b0403b1.xlsx]

## Sheet: Sheet 1 - associationsWithRelAb
	Mean relative abundances						Mean relative abundances
Species	Moderate COVID-19	Severe COVID-19	p-values	FDR-adjusted p-values		Species	Mild COVID-19	Severe COVID-19	p-values	FDR-adjusted p-values
Streptococcus pseudopneumoniae	0.00232239	0.000986968	9.97074e-06	0.000724303		Prevotella jejuni	0.166276	0.0131989	7.92871e-15	1.54213e-12
Agromyces aureus	1.59093e-05	2.14463e-05	1.24986e-05	0.000724303		Prevotella fusca	0.00776717	0.000861826	6.42488e-15	1.54213e-12
Haemophilus parainfluenzae	0.0539723	0.00584872	1.28618e-05	0.000724303		Prevotella scopos	0.0287636	0.00319969	1.83268e-14	2.37637e-12
Streptococcus thermophilus	0.0173516	0.00193918	4.64819e-06	0.000724303		Prevotella ruminicola	0.000321729	3.41218e-05	4.87863e-14	4.74447e-12
Streptococcus pneumoniae	0.0111961	0.00407145	1.10943e-05	0.000724303		Prevotella intermedia	0.0430062	0.00418484	6.95272e-14	5.40922e-12
Streptococcus mitis	0.0117163	0.00592399	6.31082e-06	0.000724303		Leptotrichia sp. oral taxon 847	0.0012671	0.000215106	1.12533e-13	7.29591e-12
Bifidobacterium breve	0.000518815	1.24377e-05	8.72122e-06	0.000724303		Odoribacter splanchnicus	0.000268408	3.0414e-05	2.47715e-13	1.20452e-11
Leptotrichia sp. oral taxon 847	0.000658322	0.000215101	1.64614e-05	0.000724303		Haemophilus pittmaniae	0.00141633	0.000194708	2.22824e-13	1.20452e-11
Streptococcus salivarius	0.0172305	0.00505334	1.636e-05	0.000724303		Campylobacter concisus	0.0269335	0.00333476	2.99208e-13	1.29325e-11
Streptococcus sp. FDAARGOS_192	0.00226411	0.000771733	2.3042e-05	0.00082951		Lachnoanaerobaculum umeaense	0.00355328	0.000241782	3.49017e-13	1.30044e-11
Bifidobacterium scardovii	0.000128406	4.71377e-06	2.2343e-05	0.00082951		Prevotella melaninogenica	0.199977	0.0285649	3.67734e-13	1.30044e-11
Streptococcus dysgalactiae	0.000230793	7.13896e-05	2.58832e-05	0.000854145		Fusobacterium periodonticum	0.0256227	0.00167829	4.59875e-13	1.39315e-11
Haemophilus pittmaniae	0.00136882	0.00019471	3.54336e-05	0.00107936		Leptotrichia sp. oral taxon 498	0.00259305	0.000389674	4.65578e-13	1.39315e-11
Streptococcus equinus	0.00254491	0.000957439	4.16312e-05	0.00117757		Lachnoclostridium sp. YL32	2.90588e-05	2.51744e-05	1.11866e-12	3.10826e-11
Streptococcus suis	0.000373522	0.000114033	5.4355e-05	0.00133281		Veillonella rodentium	0.00454441	0.000726715	1.29138e-12	3.34898e-11
Corynebacterium pseudotuberculosis	2.55954e-05	3.0839e-05	6.05824e-05	0.00133281		Capnocytophaga haemolytica	0.00011115	1.39154e-05	1.46005e-12	3.54974e-11
Streptococcus sobrinus	7.27808e-05	0.000168567	5.2506e-05	0.00133281		Prevotella sp. oral taxon 299	0.0107486	0.00326242	1.95836e-12	4.4812e-11
Haemophilus ducreyi	3.9239e-05	2.12004e-05	6.02268e-05	0.00133281		Haemophilus parainfluenzae	0.0420133	0.00585015	2.26706e-12	4.89938e-11
Haemophilus haemolyticus	0.00305779	0.00116317	0.000115682	0.00142697		Leptotrichia buccalis	0.00275222	0.000409772	5.00616e-12	1.02494e-10
Lactobacillus delbrueckii	0.00667004	0.000121718	0.000118552	0.00142697		Candidatus Saccharibacteria oral taxon TM7x	0.0027833	0.000264714	6.46535e-12	1.25751e-10
Fusobacterium hwasookii	0.000730546	0.000136847	0.000117825	0.00142697		Aggregatibacter segnis	0.000901026	0.000142977	7.25889e-12	1.34462e-10
Cutibacterium avidum	0.000254785	6.2826e-05	8.18139e-05	0.00142697		Porphyromonas crevioricanis	0.000188704	2.20821e-05	8.52896e-12	1.50808e-10
Selenomonas sp. oral taxon 478	0.0035883	0.000874243	0.000112304	0.00142697		Bacteroides dorei	0.000574861	0.00326532	1.24962e-11	2.10511e-10
Capnocytophaga leadbetteri	0.00385588	0.0016883	9.29109e-05	0.00142697		Haemophilus ducreyi	3.77686e-05	2.11879e-05	1.3529e-11	2.10511e-10
Streptococcus pyogenes	0.000667433	0.000434093	0.000107563	0.00142697		Bacteroides heparinolyticus	0.000355398	0.00713321	1.31412e-11	2.10511e-10
Selenomonas sp. oral taxon 920	0.000622895	0.00019906	8.47331e-05	0.00142697		Selenomonas sp. oral taxon 478	0.00699743	0.000874148	1.81501e-11	2.71553e-10
Leptotrichia buccalis	0.00130056	0.000409761	0.000103681	0.00142697		Aggregatibacter aphrophilus	0.00121088	0.00040383	2.64394e-11	3.80924e-10
Parascardovia denticolens	0.000163139	0.000102391	8.76258e-05	0.00142697		Fusobacterium hwasookii	0.00120699	0.000136839	4.12895e-11	5.73629e-10
Haemophilus influenzae	0.00318275	0.00107641	7.60026e-05	0.00142697		Selenomonas sp. oral taxon 136	0.0051636	0.000697214	4.38465e-11	5.88149e-10
Corynebacterium sp. ATCC 6931	8.31281e-05	1.06249e-05	0.000118914	0.00142697		Glaesserella parasuis	6.73602e-05	2.7545e-05	5.08893e-11	6.59865e-10
Leptotrichia sp. oral taxon 498	0.00141654	0.000389677	0.000113649	0.00142697		Leptotrichia sp. oral taxon 212	0.00282002	0.000677029	5.48669e-11	6.88491e-10
Streptococcus sp. oral taxon 431	0.00920061	0.00211771	8.80057e-05	0.00142697		Clostridium bolteae	4.05029e-05	0.000314933	8.08182e-11	9.73601e-10
Streptococcus agalactiae	0.000562966	0.000146039	0.000105705	0.00142697		Mannheimia sp. USDA-ARS-USMARC-1261	3.29887e-05	3.15233e-05	8.25934e-11	9.73601e-10
Clostridium botulinum	0.000153051	3.95273e-05	0.000126356	0.00147167		Haemophilus haemolyticus	0.00336536	0.00116378	9.87436e-11	1.12974e-09
Moraxella osloensis	0.000162629	0.000195814	0.000136468	0.00154404		Actinobacillus pleuropneumoniae	6.94859e-05	4.55876e-05	1.10176e-10	1.15833e-09
Capnocytophaga gingivalis	0.00224175	0.00208061	0.000143462	0.00157808		Prevotella denticola	0.00919289	0.00184924	1.06612e-10	1.15833e-09
Lactobacillus gasseri	0.00527094	0.000691947	0.000150092	0.00160639		Prevotella enoeca	0.00609128	0.00105356	1.09773e-10	1.15833e-09
Clostridium bolteae	3.00056e-05	0.000314864	0.00016312	0.00164931		Bacteroides zoogleoformans	0.000627726	0.000649087	1.5835e-10	1.621e-09
Lactobacillus salivarius	0.000399444	4.88783e-05	0.000162401	0.00164931		Fusobacterium gonidiaformans	1.15631e-05	0.00212893	1.69421e-10	1.68987e-09
Bifidobacterium longum	0.00928495	8.22534e-05	0.000166597	0.00164931		Haemophilus influenzae	0.00351101	0.00107686	2.17161e-10	2.11189e-09
Actinoalloteichus sp. AHMU CJ021	4.33592e-05	0.000115588	0.000181029	0.00174848		Mannheimia haemolytica	5.07122e-05	3.89103e-05	2.311e-10	2.19263e-09
Selenomonas sp. oral taxon 126	0.000475861	0.000197121	0.000190505	0.00175442		Porphyromonas asaccharolytica	0.000868763	0.000265218	3.44211e-10	3.18805e-09
Microbacterium sp. TPU 3598	9.99862e-05	0.00011419	0.000186836	0.00175442		Clostridium botulinum	0.000152697	3.95336e-05	4.14828e-10	3.75275e-09
Streptococcus sanguinis	0.00354334	0.0047111	0.000213982	0.00181814		Actinobacillus porcitonsillarum	7.35398e-05	5.6818e-05	8.07006e-10	7.13467e-09
Streptococcus sp. A12	0.00314702	0.00135789	0.000217321	0.00181814		Haemophilus sp. oral taxon 036	0.00116139	0.000900413	9.41437e-10	8.1382e-09
Microbacterium sp. LKL04	1.84342e-05	3.17604e-05	0.000223186	0.00181814		Bacteroides vulgatus	0.000112142	0.000258884	1.03196e-09	8.72676e-09
Actinomyces meyeri	0.00313293	0.00134356	0.000224972	0.00181814		Veillonella parvula	0.0516716	0.0192654	1.17117e-09	9.69333e-09
Campylobacter concisus	0.00721977	0.00333512	0.000224972	0.00181814		Selenomonas sp. oral taxon 126	0.000704567	0.000197072	1.32467e-09	1.07353e-08
Porphyromonas asaccharolytica	0.000113151	0.000265308	0.00022461	0.00181814		Gardnerella vaginalis	3.29924e-05	0.00352657	1.60309e-09	1.27266e-08
Aggregatibacter aphrophilus	0.00130793	0.000403755	0.000243865	0.00193141		Eubacterium sulci	0.00344745	0.00108766	1.81079e-09	1.40879e-08
Micrococcus luteus	0.000358962	0.000177871	0.000252688	0.00196205		Capnocytophaga leadbetteri	0.00735022	0.00168835	1.8931e-09	1.41619e-08
Streptococcus lutetiensis	0.000128127	2.84972e-05	0.000268347	0.00198039		Selenomonas sp. oral taxon 920	0.000593541	0.000199074	1.8931e-09	1.41619e-08
Streptococcus sp. I-P16	0.00271346	0.000915013	0.000260562	0.00198039		Actinobacillus suis	4.01435e-05	2.49129e-05	2.31648e-09	1.70021e-08
Streptococcus oralis	0.0287469	0.00903202	0.000270053	0.00198039		Actinomyces meyeri	0.00361118	0.00134361	2.60461e-09	1.87629e-08
Fusobacterium periodonticum	0.00620539	0.0016783	0.000279915	0.00198144		Mannheimia varigena	5.9505e-05	3.46659e-05	3.3335e-09	2.35769e-08
Veillonella rodentium	0.00253679	0.000726534	0.000280204	0.00198144		Fusobacterium necrophorum	5.38777e-05	1.83756e-05	3.62814e-09	2.52026e-08
Gardnerella vaginalis	0.000408466	0.00352637	0.000288333	0.00200315		Pseudomonas fluorescens	0.000116267	4.88105e-05	3.8538e-09	2.63005e-08
Prevotella jejuni	0.0575823	0.0131959	0.000299816	0.00201233		Streptococcus salivarius	0.0144277	0.00505907	4.19633e-09	2.81443e-08
Streptococcus sp. I-G2	0.00239632	0.000939516	0.000299724	0.00201233		Filifactor alocis	0.0018093	0.000148111	4.42143e-09	2.91515e-08
Corynebacterium kroppenstedtii	0.000909375	7.39348e-05	0.000322755	0.00213018		Capnocytophaga sputigena	0.0022944	0.000712634	5.33034e-09	3.45583e-08
Selenomonas sp. oral taxon 136	0.00256118	0.00069728	0.000329697	0.00214033		Capnocytophaga sp. ChDC OS43	0.000859833	0.000362817	5.44424e-09	3.47182e-08
Mannheimia haemolytica	4.64796e-05	3.8931e-05	0.000341324	0.00214377		Neisseria subflava	0.0424517	0.0345615	6.00064e-09	3.76492e-08
Leptotrichia sp. oral taxon 212	0.00141744	0.000676943	0.000346468	0.00214377		Microbacterium paludicola	4.38513e-05	3.30174e-05	7.41904e-09	4.50938e-08
Pediococcus claussenii	0.000797816	9.39999e-07	0.00034125	0.00214377		Neisseria polysaccharea	0.000840894	0.000734272	7.34899e-09	4.50938e-08
Fusobacterium nucleatum	0.0123602	0.00288588	0.000358348	0.00218317		Acinetobacter pittii	4.42648e-05	2.82306e-05	8.11877e-09	4.85877e-08
Aggregatibacter segnis	0.000563945	0.000143	0.000387287	0.00230976		Mogibacterium diversum	0.00226154	0.000802891	8.70116e-09	5.09496e-08
Mannheimia sp. USDA-ARS-USMARC-1261	2.38068e-05	3.15395e-05	0.000390794	0.00230976		Campylobacter curvus	0.000137611	6.1246e-05	8.77539e-09	5.09496e-08
Prevotella intermedia	0.0137015	0.00418498	0.000412511	0.00236746		Neisseria lactamica	0.00148642	0.00113405	9.61063e-09	5.41817e-08
Lactobacillus reuteri	0.000246612	1.91871e-05	0.000406585	0.00236746		Aggregatibacter actinomycetemcomitans	0.000162664	1.86601e-05	9.5895e-09	5.41817e-08
Streptococcus australis	0.0034523	0.00119746	0.000419808	0.00237491		Neisseria cinerea	0.00124092	0.00324953	1.11283e-08	6.18415e-08
Streptococcus parasanguinis	0.0380715	0.0182511	0.000493232	0.00271825		Streptococcus sp. oral taxon 431	0.00582688	0.00211928	1.17886e-08	6.45881e-08
Streptococcus gordonii	0.00249549	0.00317435	0.000494227	0.00271825		Streptococcus equinus	0.00122744	0.000958736	1.40114e-08	7.57006e-08
Prevotella fusca	0.00260216	0.000861637	0.000529546	0.00287261		Atopobium parvulum	0.00295234	0.000827703	1.76584e-08	9.40974e-08
Actinobacillus suis	2.72e-05	2.4928e-05	0.000565546	0.00294679		Staphylococcus pettenkoferi	1.01098e-05	7.22294e-05	1.87311e-08	9.71517e-08
Lachnoanaerobaculum umeaense	0.00139391	0.000241781	0.000561794	0.00294679		Microbacterium sp. BH-3-3-3	4.74044e-05	4.14353e-05	1.85286e-08	9.71517e-08
Prevotella denticola	0.0219452	0.00184851	0.000558955	0.00294679		Streptococcus pyogenes	0.000522662	0.000434253	2.21442e-08	1.13344e-07
Streptococcus cristatus	0.000958413	0.00110294	0.000639519	0.00325217		Leifsonia xyli	9.29708e-05	8.4247e-05	2.39994e-08	1.21244e-07
Treponema sp. OMZ 838	0.00120162	0.00024858	0.000643893	0.00325217		Streptococcus pseudopneumoniae	0.00174486	0.000987268	3.05435e-08	1.52326e-07
Lactobacillus amylovorus	9.48451e-05	2.5197e-05	0.000648792	0.00325217		Mogibacterium pumilum	0.000221661	6.66269e-05	3.18254e-08	1.5671e-07
Neisseria zoodegmatis	9.63325e-05	0.000151177	0.000671978	0.00332629		Streptococcus sp. FDAARGOS_192	0.00138666	0.000772684	3.32182e-08	1.61524e-07
Mannheimia varigena	5.04663e-05	3.46844e-05	0.000682095	0.00333468		Neisseria meningitidis	0.00914442	0.007253	4.0222e-08	1.93165e-07
Streptococcus sp. NPS 308	0.00311579	0.000921751	0.000698461	0.00337306		Capnocytophaga gingivalis	0.00397838	0.00208085	4.07972e-08	1.93538e-07
Selenomonas sputigena	0.00172325	0.000503935	0.00074994	0.00354893		Prevotella dentalis	0.000816706	0.000339427	4.46493e-08	2.0926e-07
Rothia dentocariosa	0.00775251	0.018139	0.000761764	0.00354893		Tannerella sp. oral taxon HOT-286	0.0127182	0.00236853	4.5706e-08	2.11662e-07
Prevotella scopos	0.00911307	0.00319931	0.000760019	0.00354893		Neisseria sp. 10022	0.000222724	0.000162344	4.73831e-08	2.16847e-07
Sinomonas atrocyanea	3.7366e-05	4.44842e-05	0.000775277	0.00356988		Cupriavidus basilensis	9.26615e-05	3.25532e-05	4.89734e-08	2.21519e-07
Prevotella melaninogenica	0.0674013	0.0285615	0.000795866	0.00362256		Lachnospiraceae bacterium oral taxon 500	0.000278401	9.93544e-05	5.78331e-08	2.58587e-07
Lachnospiraceae bacterium oral taxon 500	0.000342868	9.9362e-05	0.000807302	0.00363286		Streptococcus australis	0.00233465	0.00119851	6.54018e-08	2.89106e-07
Corynebacterium ammoniagenes	8.73045e-05	5.5575e-05	0.000864067	0.00384461		Fusobacterium sp. oral taxon 203	0.000345564	0.000253281	7.4763e-08	3.26773e-07
Olsenella sp. oral taxon 807	0.000415255	0.000850888	0.000900728	0.0039632		Streptococcus sp. I-G2	0.00163736	0.000940391	7.84376e-08	3.39025e-07
Actinomyces pacaensis	0.00401711	0.00132004	0.000916848	0.00398376		Fusobacterium nucleatum	0.00851512	0.00288585	9.03954e-08	3.82215e-07
Pseudomonas fluorescens	4.89937e-05	4.87859e-05	0.000925519	0.00398376		Streptococcus mitis	0.00675944	0.00592733	8.99933e-08	3.82215e-07
Capnocytophaga sp. ChDC OS43	0.0011336	0.000362759	0.000947243	0.00399051		Actinobacillus equuli	2.6867e-05	2.20324e-05	9.39465e-08	3.92959e-07
Lawsonella clevelandensis	0.000103991	0.00019319	0.000939107	0.00399051		Neisseria weaveri	0.000113553	8.43739e-05	9.5947e-08	3.97057e-07
Rothia mucilaginosa	0.0810477	0.023794	0.00104694	0.0043641		Streptococcus sp. I-P16	0.00174392	0.000915857	9.96587e-08	4.08076e-07
Veillonella parvula	0.0385393	0.019253	0.00106273	0.00438376		Microbacterium sp. LKL04	3.64013e-05	3.17799e-05	1.00999e-07	4.09255e-07
Rhodococcus ruber	7.85563e-05	3.51979e-06	0.00110366	0.00449267		Treponema putidum	0.000138677	3.10256e-05	1.10879e-07	4.44658e-07
Finegoldia magna	0.000153694	0.000142214	0.0011572	0.00449267		Neisseria zoodegmatis	0.000208493	0.000151131	1.16782e-07	4.63554e-07
Haemophilus sp. oral taxon 036	0.000833213	0.000899665	0.00114721	0.00449267		Actinomyces pacaensis	0.00270439	0.00131998	1.20746e-07	4.74447e-07
Streptococcus sp. oral taxon 064	0.00500532	0.00153895	0.0011572	0.00449267		Neisseria sp. 10023	0.000336583	0.00025936	1.22412e-07	4.76181e-07
Staphylococcus cohnii	3.50564e-05	5.03605e-05	0.00114867	0.00449267		Treponema sp. OMZ 838	0.00230088	0.000248528	1.38426e-07	5.33145e-07
Prevotella sp. oral taxon 299	0.00372323	0.00326136	0.00113265	0.00449267		Cupriavidus metallidurans	5.47113e-05	3.74732e-05	1.458e-07	5.56043e-07
Corynebacterium argentoratense	2.67536e-05	3.73349e-05	0.00116893	0.00449414		Microbacterium sp. TPU 3598	9.01469e-05	0.000114257	1.49751e-07	5.60175e-07
Actinobacillus porcitonsillarum	5.39073e-05	5.6853e-05	0.00118937	0.00452875		Streptococcus agalactiae	0.000245903	0.000146128	1.49764e-07	5.60175e-07
Corynebacterium frankenforstense	4.15018e-05	3.76571e-05	0.00125486	0.00473261		Neisseria sp. KEM232	0.000997771	0.00202837	1.58448e-07	5.87013e-07
Neisseria subflava	0.0232427	0.0345557	0.00131132	0.00489889		Paraburkholderia phytofirmans	6.44946e-05	4.28393e-05	1.67523e-07	6.14779e-07
Capnocytophaga sp. oral taxon 864	0.000370038	0.000377834	0.00134602	0.0049354		Actinomyces hongkongensis	0.00159236	0.000685355	1.80549e-07	6.56388e-07
Capnocytophaga sputigena	0.00883637	0.000712633	0.00133357	0.0049354		Streptococcus sp. A12	0.00290734	0.00135885	1.91429e-07	6.89498e-07
Filifactor alocis	0.0016987	0.000148138	0.0013959	0.00496867		Selenomonas sputigena	0.00154518	0.00050404	1.97222e-07	7.03847e-07
Gemella morbillorum	0.000916104	0.000454571	0.00139688	0.00496867		Moraxella catarrhalis	0.000245852	1.89313e-06	2.84324e-07	1.00547e-06
Prevotella dentalis	0.000851474	0.00033952	0.00140528	0.00496867		Staphylococcus cohnii	2.61103e-05	5.03952e-05	3.65961e-07	1.28251e-06
Propionibacterium freudenreichii	5.69111e-05	0.000135994	0.00137281	0.00496867		Streptococcus sanguinis	0.00306222	0.00471262	3.87188e-07	1.33289e-06
Microbacterium sp. BH-3-3-3	5.77572e-05	4.14093e-05	0.00155679	0.00545565		Streptococcus parasanguinis	0.0183611	0.0182691	3.87188e-07	1.33289e-06
Lactobacillus helveticus	7.76908e-05	2.82104e-05	0.00160223	0.00556565		Dialister pneumosintes	0.00113647	0.000488555	3.98997e-07	1.36149e-06
Glaesserella parasuis	9.24919e-05	2.75556e-05	0.00163455	0.00562853		Bifidobacterium longum	0.00195718	8.23071e-05	4.09672e-07	1.38576e-06
Fusobacterium sp. oral taxon 203	0.000517478	0.000253386	0.00166436	0.00568176		Neisseria gonorrhoeae	0.000963753	0.000709491	4.80779e-07	1.61227e-06
Capnocytophaga ochracea	0.000363195	0.000290294	0.00168032	0.00568725		Rhodococcus hoagii	5.23466e-05	4.12543e-06	4.96891e-07	1.65206e-06
Leifsonia sp. 21MFCrub1.1	1.8271e-05	7.34455e-05	0.00172437	0.00573822		Neisseria sicca	0.00354572	0.00185872	5.37236e-07	1.77106e-06
Microbacterium paludicola	1.60794e-05	3.29982e-05	0.00171758	0.00573822		Lactobacillus delbrueckii	3.82376e-05	0.000121831	7.28364e-07	2.3522e-06
Porphyromonas gingivalis	0.0116186	0.00176227	0.0018398	0.00607134		Agromyces aureus	2.42096e-05	2.14611e-05	7.28364e-07	2.3522e-06
Actinobacillus equuli	2.05657e-05	2.20467e-05	0.0018893	0.00618317		Bifidobacterium breve	0.000116583	1.24459e-05	7.31662e-07	2.3522e-06
Neisseria lactamica	0.000861924	0.00113371	0.00206009	0.00668686		Streptococcus pneumoniae	0.00516802	0.00407326	7.53431e-07	2.40233e-06
Streptococcus mutans	0.000463773	0.000553274	0.0020988	0.00675711		Achromobacter xylosoxidans	0.00012987	0.000108609	7.69334e-07	2.4331e-06
Bacteroides heparinolyticus	0.00015505	0.00713957	0.0021385	0.00677476		Variovorax paradoxus	4.32906e-05	4.6629e-05	8.10027e-07	2.54113e-06
Neisseria polysaccharea	0.000447317	0.000734021	0.00212276	0.00677476		Bacteroides fragilis	0.000239239	0.000466734	8.29176e-07	2.5804e-06
Treponema denticola	0.00149125	0.000638062	0.0021795	0.00684987		Agrobacterium tumefaciens	0.000127464	5.61663e-05	8.44117e-07	2.60604e-06
Variovorax paradoxus	2.23692e-05	4.66061e-05	0.00220428	0.00687317		Actinoalloteichus sp. AHMU CJ021	9.26101e-05	0.000115468	8.96054e-07	2.74461e-06
Aggregatibacter actinomycetemcomitans	0.000407484	1.86596e-05	0.00225967	0.00699086		Corynebacterium pseudotuberculosis	1.92595e-05	3.08559e-05	9.86113e-07	2.99686e-06
Bacteroides zoogleoformans	0.000306765	0.000649592	0.00232862	0.00709147		Haemophilus aegyptius	0.000150895	4.05836e-05	1.22113e-06	3.68232e-06
Actinobacillus pleuropneumoniae	7.95077e-05	4.56161e-05	0.00234105	0.00709147		Porphyromonas gingivalis	0.00765913	0.00176216	1.26112e-06	3.77367e-06
Streptococcus intermedius	0.000776158	0.000639424	0.00234592	0.00709147		Neisseria mucosa	0.00322774	0.00164506	1.58836e-06	4.71659e-06
Prevotella enoeca	0.00191249	0.0010534	0.00240758	0.00722274		Lactobacillus salivarius	5.50059e-05	4.89212e-05	1.76362e-06	5.19734e-06
Eubacterium minutum	3.31816e-05	8.44077e-05	0.00249471	0.00742785		Acidovorax carolinensis	5.3004e-05	3.4568e-05	1.96297e-06	5.74132e-06
Lachnoclostridium sp. YL32	1.75296e-05	2.5169e-05	0.00252285	0.00745559		Neisseria elongata	0.00409165	0.00324975	2.20163e-06	6.39129e-06
Dermabacter vaginalis	0.000140448	3.51357e-05	0.00257572	0.00749989		Lactobacillus sakei	3.17411e-05	4.4276e-05	2.27574e-06	6.55749e-06
Acidipropionibacterium acidipropionici	1.77517e-05	3.88162e-05	0.00257305	0.00749989		Actinomyces sp. Chiba101	0.000121986	0.000117327	2.31314e-06	6.61627e-06
Bacteroides vulgatus	5.40117e-05	0.000258897	0.00281789	0.00809695		Eikenella corrodens	0.00125327	0.00121606	2.35049e-06	6.67403e-06
Neisseria weaveri	4.55389e-05	8.43843e-05	0.00282167	0.00809695		Moraxella bovoculi	6.39147e-05	7.90804e-07	3.95723e-06	1.11548e-05
Atopobium parvulum	0.00496195	0.000827353	0.00290914	0.0081805		Rothia mucilaginosa	0.0264713	0.0238132	4.02754e-06	1.11908e-05
Campylobacter curvus	8.44489e-05	6.12373e-05	0.00290445	0.0081805		Ottowia sp. oral taxon 894	0.00183764	0.000608931	4.00132e-06	1.11908e-05
Neisseria sp. 10023	0.000132374	0.000259471	0.00291275	0.0081805		Streptococcus sp. oral taxon 064	0.000949719	0.0015406	4.19598e-06	1.15761e-05
Streptococcus gallolyticus	7.59556e-05	5.77288e-05	0.00328959	0.00900792		Acinetobacter nosocomialis	0.000145309	0.000157764	4.36939e-06	1.19697e-05
Microbacterium sp. PM5	2.72175e-05	7.69563e-05	0.00329835	0.00900792		Acinetobacter lwoffii	2.58223e-05	2.49057e-05	4.6476e-06	1.26428e-05
Cryptobacterium curtum	0.000111971	5.88621e-05	0.00326822	0.00900792		Streptococcus gallolyticus	6.28279e-05	5.77793e-05	4.86069e-06	1.31306e-05
Staphylococcus pettenkoferi	4.33773e-05	7.21356e-05	0.00326737	0.00900792		Staphylococcus equorum	1.20973e-05	3.79041e-05	4.97261e-06	1.33403e-05
Fusobacterium gonidiaformans	1.4057e-05	0.00213084	0.00353155	0.00957872		Microbacterium sp. XT11	0.000110453	0.000174816	5.12088e-06	1.3644e-05
Neisseria sp. KEM232	0.000521035	0.00203013	0.00361189	0.00972998		Propionibacterium freudenreichii	0.000115928	0.00013609	5.51077e-06	1.45829e-05
Neisseria cinerea	0.000859348	0.00324708	0.00370438	0.00991173		Capnocytophaga ochracea	0.000221259	0.000290367	6.04724e-06	1.58944e-05
Actinomyces oris	0.00331431	0.00389151	0.00389028	0.0103393		Gemella morbillorum	0.000479491	0.000454817	8.30816e-06	2.16904e-05
Lactobacillus sakei	0.000649495	4.42649e-05	0.00426929	0.0112709		Lactobacillus amylovorus	7.50445e-06	2.52282e-05	8.4696e-06	2.19645e-05
Actinomyces radicidentis	0.000275681	0.000166815	0.00431838	0.011325		Leifsonia sp. 21MFCrub1.1	5.39903e-05	7.34944e-05	8.73596e-06	2.25052e-05
Bacteroides dorei	0.000222845	0.00326532	0.00439938	0.0113866		Lactobacillus gasseri	0.000727288	0.000692901	9.36725e-06	2.39728e-05
Capnocytophaga sp. oral taxon 323	0.000435833	0.0003736	0.00439679	0.0113866		Finegoldia magna	4.44006e-05	0.000142318	9.50582e-06	2.40115e-05
Microbacterium sp. XT11	0.000126995	0.000174716	0.00449531	0.0115369		Moraxella osloensis	0.000723069	0.00019584	9.48647e-06	2.40115e-05
Microbacterium testaceum	1.47075e-05	3.45389e-05	0.00451569	0.0115369		Capnocytophaga sp. oral taxon 864	0.000274838	0.000377903	9.87404e-06	2.47807e-05
Pseudomonas sp. ATCC 13867	0.000126175	3.4185e-05	0.00458089	0.0115543		Streptococcus thermophilus	0.000639402	0.00193982	1.06842e-05	2.6642e-05
Candidatus Saccharibacteria oral taxon TM7x	0.000689287	0.000264706	0.00456065	0.0115543		Lactococcus raffinolactis	2.3979e-05	5.93416e-05	1.08722e-05	2.69265e-05
Tannerella sp. oral taxon HOT-286	0.00364626	0.00236836	0.00473256	0.0118613		Lactobacillus curvatus	6.93417e-06	0.000116042	1.09367e-05	2.69265e-05
Lactococcus lactis	0.000792104	0.00623309	0.00480543	0.0119394		Streptococcus cristatus	0.000716145	0.00110383	1.10345e-05	2.69963e-05
Actinomyces sp. oral taxon 897	0.000343592	0.000242421	0.00482401	0.0119394		Streptococcus sp. NPS 308	0.000743767	0.000922672	1.23603e-05	2.98901e-05
Corynebacterium diphtheriae	0.000640482	0.000611958	0.00490889	0.0119713		Streptococcus gordonii	0.00151702	0.00317824	1.2371e-05	2.98901e-05
Eikenella corrodens	0.000442733	0.00121595	0.00490889	0.0119713		Sinomonas atrocyanea	3.71144e-05	4.45104e-05	1.58576e-05	3.80779e-05
Leuconostoc carnosum	6.1752e-05	7.10984e-07	0.00492759	0.0119713		Staphylococcus epidermidis	0.000136835	0.0592757	1.63078e-05	3.89186e-05
Tannerella forsythia	0.00554589	0.00349062	0.00501133	0.0121005		Microbacterium sp. No. 7	7.6482e-05	0.000159263	2.1657e-05	5.13694e-05
Sphingomonas koreensis	1.12642e-05	3.22111e-05	0.00515262	0.0123663		Citrobacter werkmanii	1.64495e-05	3.4469e-05	2.22693e-05	5.25015e-05
Actinomyces hongkongensis	0.00125247	0.000685286	0.00537286	0.0128172		Tannerella forsythia	0.00999354	0.00348979	2.40804e-05	5.64293e-05
Bacillus subtilis	0.000133283	3.09248e-05	0.00542654	0.0128677		Streptococcus oralis	0.00400049	0.00904247	2.55612e-05	5.95408e-05
Lactococcus raffinolactis	2.15598e-05	5.94024e-05	0.00588443	0.0138704		Actinomyces radicidentis	0.000200903	0.00016685	2.59099e-05	5.99938e-05
Neisseria sp. 10022	9.51374e-05	0.000162358	0.00618928	0.0145027		Pseudomonas stutzeri	5.09907e-05	6.30238e-05	2.96367e-05	6.8217e-05
Neisseria meningitidis	0.00447947	0.00725157	0.00658177	0.0153317		Microbacterium hominis	4.94593e-05	5.04488e-05	3.473e-05	7.94705e-05
Eubacterium sulci	0.00100931	0.00108785	0.0066721	0.0154512		Lactococcus lactis	0.00216581	0.00623085	3.6537e-05	8.31163e-05
Leifsonia xyli	0.000105745	8.41994e-05	0.00739121	0.0169751		Ornithobacterium rhinotracheale	0.00042834	0.000164343	4.58712e-05	0.000103744
Streptomyces lydicus	7.80055e-05	0.000113988	0.00741589	0.0169751		Eubacterium minutum	3.75361e-05	8.43472e-05	4.94276e-05	0.000111141
Bacteroides fragilis	0.000204183	0.000466645	0.0074821	0.0170282		Treponema denticola	0.00250469	0.000638146	5.04743e-05	0.000112842
Neisseria gonorrhoeae	0.000448158	0.000709382	0.00770306	0.0174309		Microbacterium testaceum	4.49396e-05	3.45605e-05	5.46959e-05	0.000121581
Lactobacillus mucosae	9.25067e-05	4.54748e-06	0.00788495	0.0177411		Ochrobactrum anthropi	0.000164243	0.000246744	5.76693e-05	0.000127462
Zhihengliuella sp. ISTPL4	9.05143e-05	0.000131564	0.00823475	0.01832		Microbacterium sp. PM5	9.86484e-05	7.70007e-05	6.0165e-05	0.000132227
Acidipropionibacterium virtanenii	9.8606e-06	2.42325e-05	0.0082115	0.01832		Pseudomonas putida	0.000299844	0.000100456	6.62664e-05	0.000144818
Lactobacillus crispatus	0.00116192	0.000518602	0.00882912	0.0195326		Moraxella bovis	0.000250575	8.41071e-07	7.89715e-05	0.00017162
Microbacterium pygmaeum	9.72047e-06	2.87445e-05	0.00918892	0.0202156		Actinomyces sp. oral taxon 897	0.000158242	0.000242557	7.94507e-05	0.000171702
Deinococcus sp. NW-56	0.00036327	1.93459e-05	0.00975148	0.0213347		Capnocytophaga sp. oral taxon 323	0.000322439	0.000373682	8.26639e-05	0.000177659
Neisseria mucosa	0.00171364	0.00164498	0.0103872	0.0226008		Streptococcus sobrinus	2.35706e-05	0.000168771	8.95748e-05	0.000191454
Pediococcus pentosaceus	1.09854e-05	2.53397e-05	0.0106503	0.0230466		Rothia dentocariosa	0.00315654	0.0181455	9.07679e-05	0.000192944
Staphylococcus equorum	5.07481e-06	3.78934e-05	0.0108343	0.0233172		Proteus mirabilis	2.05665e-05	0.0275185	0.000102704	0.00021713
Scardovia inopinata	0.000170152	3.58214e-05	0.0113817	0.024232		Zhihengliuella sp. ISTPL4	0.000157934	0.000131645	0.000107157	0.000225319
Actinomyces sp. Chiba101	0.000116474	0.000117315	0.0113339	0.024232		Campylobacter gracilis	0.000458003	0.00119289	0.000121446	0.000253992
Mogibacterium diversum	0.00171103	0.000802741	0.0116961	0.024688		Akkermansia muciniphila	2.85988e-06	0.000269285	0.000125567	0.000261207
Streptococcus macedonicus	0.000112525	4.50905e-05	0.0117206	0.024688		Actinomyces oris	0.00216992	0.00389305	0.000130761	0.000270564
Acinetobacter pittii	2.73124e-05	2.82123e-05	0.0119905	0.025123		Parascardovia denticolens	2.7538e-05	0.000102515	0.000135263	0.000277298
Corynebacterium jeikeium	0.000205761	0.000227446	0.012094	0.0252064		Microbacterium pygmaeum	2.92529e-05	2.8763e-05	0.000135441	0.000277298
Neisseria elongata	0.00433474	0.00325063	0.0123225	0.0255481		Streptococcus intermedius	0.000440288	0.000639754	0.000169559	0.000345332
Microbacterium chocolatum	3.68646e-05	0.000115641	0.012718	0.026095		Corynebacterium argentoratense	1.97028e-05	3.73659e-05	0.000174139	0.000352812
Corynebacterium minutissimum	0.000173036	0.000157566	0.0126843	0.026095		Bordetella hinzii	8.51033e-06	0.000102162	0.000205148	0.000413486
Haemophilus aegyptius	0.000139665	4.05565e-05	0.013133	0.0268077		Acidipropionibacterium virtanenii	9.43387e-06	2.42452e-05	0.000215744	0.000432599
Lactobacillus curvatus	2.32775e-05	0.000116021	0.0147696	0.0299937		Pseudopropionibacterium propionicum	0.000430744	0.000534241	0.000218182	0.000435246
Neisseria sicca	0.00181581	0.0018587	0.0150155	0.0303374		Streptococcus mutans	0.000101759	0.00055358	0.000248641	0.000493476
Akkermansia muciniphila	1.95198e-06	0.000269631	0.0155707	0.0312995		Stenotrophomonas maltophilia	0.000110438	0.000139998	0.000291798	0.00057619
Lactobacillus fermentum	0.00210917	0.00119772	0.0171404	0.0342808		Acidipropionibacterium acidipropionici	1.6867e-05	3.88373e-05	0.000303899	0.000597055
Cupriavidus metallidurans	2.58676e-05	3.74541e-05	0.0172613	0.034349		Staphylococcus xylosus	7.92841e-06	7.08301e-05	0.000314556	0.000614887
Dialister pneumosintes	0.000507656	0.00048859	0.0175847	0.0348177		Hafnia alvei	8.0241e-06	0.00026606	0.000355943	0.000692309
Nocardia farcinica	2.07799e-05	5.78578e-05	0.0180527	0.0355664		Corynebacterium frankenforstense	1.21633e-05	3.76818e-05	0.000364588	0.000705596
Achromobacter xylosoxidans	7.09548e-05	0.00010856	0.0183616	0.0358187		Microbacterium chocolatum	6.20441e-05	0.000115721	0.000391605	0.000754131
Corynebacterium deserti	2.98417e-05	3.54699e-05	0.0183447	0.0358187		Olsenella sp. oral taxon 807	0.000183983	0.000851321	0.000437694	0.000838734
Corynebacterium casei	0.000119366	8.98733e-05	0.0191157	0.037107		Microbacterium sp. PAMC 28756	0.000162045	0.000161967	0.000477185	0.000909926
Corynebacterium urealyticum	6.61888e-05	6.27671e-05	0.0198129	0.038087		Agrococcus carbonis	4.12834e-05	6.80099e-05	0.00064647	0.00122672
Proteus mirabilis	6.04396e-05	0.0275179	0.0198129	0.038087		Microbacterium aurum	9.77314e-05	0.000131193	0.000745062	0.00140694
Campylobacter gracilis	0.0010811	0.00119299	0.0212151	0.0405855		Microbacterium foliorum	0.000214091	0.000414675	0.000786921	0.0014788
Staphylococcus capitis	0.000488938	0.00030533	0.022271	0.0424005		Acinetobacter junii	0.000141223	0.00021488	0.00111716	0.00208931
Acinetobacter johnsonii	8.33046e-05	1.6728e-05	0.0244312	0.0462907		Pseudomonas sp. ATCC 13867	5.74463e-06	3.42264e-05	0.00114589	0.00213279
Microbacterium sp. PAMC 28756	7.00318e-05	0.000161872	0.0246071	0.0464019		Shinella sp. HZN7	4.59751e-05	2.52465e-05	0.00135525	0.00251044
Leuconostoc mesenteroides	2.30172e-05	3.23387e-05	0.0254306	0.0477275		Klebsiella pneumoniae	0.0010802	0.0112658	0.00153175	0.00282394
						Nocardia farcinica	4.60228e-05	5.78915e-05	0.00158825	0.00291429
						Nocardia cyriacigeorgica	0.000217061	0.000261937	0.00179254	0.0032737
						Streptomyces chartreusis	5.23233e-05	3.19522e-06	0.00182539	0.00331812
Table S7. Summary of significantly different species in the oropharyngeal microbiome between mild vs. severe COVID-19 and moderate vs. severe COVID-19; statistical testing by Wilcoxon tests and FDR correction of p-values.						Paraburkholderia fungorum	0.000814787	0.000716757	0.00202773	0.00366877
						Staphylococcus aureus	0.0171313	0.117081	0.00208697	0.00375848
						Lactobacillus casei	2.12345e-05	0.000216766	0.00210865	0.00378002
						Salmonella enterica	0.000108583	0.000460485	0.00299272	0.00534022
						Parvimonas micra	0.0004085	0.000933437	0.00301577	0.00535678
						Janthinobacterium sp. 1_2014MBL_MicDiv	7.49682e-05	0.000172313	0.00371719	0.00657266
						Enterobacter cloacae	0.000340038	0.00468087	0.00387081	0.00681333
						Actinomyces sp. oral taxon 414	0.000428852	0.00098664	0.00405496	0.00710532
						Cupriavidus taiwanensis	7.60744e-05	9.44831e-05	0.00416031	0.00722482
						Pediococcus pentosaceus	3.67179e-06	2.53588e-05	0.00414404	0.00722482
						Corynebacterium ammoniagenes	7.34438e-06	5.5607e-05	0.00439733	0.0076025
						Desulfobulbus sp. ORNL	0.000368399	0.000313866	0.00469511	0.0080814
						Mycoplasma canadense	5.69538e-06	8.57737e-05	0.00550294	0.00943015
						Flavobacterium psychrophilum	5.89987e-05	0.000101943	0.0062863	0.0107253
						Corynebacterium stationis	1.25508e-07	9.28368e-05	0.0064777	0.0110036
						Streptococcus macedonicus	3.846e-05	4.51371e-05	0.0067478	0.0114126
						Variovorax boronicumulans	0.000117951	3.4169e-05	0.00690706	0.0116314
						Lysobacter enzymogenes	7.81663e-05	3.13218e-05	0.00869654	0.0145817
						Acidovorax sp. KKS102	7.37188e-05	4.63932e-05	0.00888955	0.0148414
						Enterobacter sp. E20	0.000103605	0.000608564	0.00953896	0.0158575
						Alcaligenes faecalis	8.15397e-05	0.000444179	0.0104813	0.0173499
						Micrococcus luteus	0.000348918	0.000177972	0.0111771	0.0184233
						Lactobacillus fermentum	0.000251634	0.00119924	0.0118586	0.0194641
						Cryptobacterium curtum	0.000134102	5.89001e-05	0.0127296	0.020806
						Yersinia enterocolitica	0.000538776	0.00372851	0.0167875	0.0273235
						Scardovia inopinata	1.36319e-05	3.5867e-05	0.0172826	0.0280123
						Enterococcus durans	1.52565e-05	0.00025865	0.0185363	0.0299196
						Streptomyces sp. RTd22	0.000230116	0.00137047	0.0198923	0.0319756
						Microbacterium sp. str. China	0.000114024	0.000176943	0.0226121	0.036198
						Serratia marcescens	2.04384e-05	0.009132	0.0235796	0.037592
						Corynebacterium urealyticum	1.57124e-05	6.27926e-05	0.0242379	0.0384839
						Candidatus Portiera aleyrodidarum	0.0185446	0.125306	0.0271561	0.042942
						Pasteurella multocida	0.00143198	0.00884746	0.0281448	0.0443252
						Lactobacillus sanfranciscensis	5.8196e-05	0.000336259	0.0301895	0.0473537
						Lactobacillus paracasei	4.25649e-06	0.00148895	0.0314141	0.0490767
						Legionella pneumophila	0.000604379	0.00409955	0.0318534	0.049564
						Corynebacterium jeikeium	3.71216e-05	0.000227611	0.0322098	0.0499187
						Tumebacillus avium	7.35028e-05	0.000485986	0.0323886	0.0499967
